# Supplementary material
Source: PubMed Central journal article supplement (PMC4049077)
Supplement: NIHMS583009-supplement-supplemental_info.pdf [file NIHMS583009-supplement-supplemental_info.pdf]

## Supplementary Information

### Oomycete Pathogens Encode RNA Silencing Suppressors

Yongli Qiao<sup>1,2</sup>, Lin Liu<sup>3,4</sup>, Qin Xiong<sup>5</sup>, Cristina Flores<sup>1</sup>, James Wong<sup>1,2</sup>, Jinxia Shi<sup>1</sup>, Xianbing Wang<sup>1</sup>, Xigang Liu<sup>3</sup>, Qijun Xiang<sup>1</sup>, Shushu Jiang<sup>1</sup>, Fuchun Zhang<sup>4</sup>, Yuanchao Wang<sup>5</sup>, Howard S. Judelson<sup>1,2</sup>, Xuemei Chen<sup>2,3,6</sup>, Wenbo Ma<sup>1,2,\*</sup>

1. Department of Plant Pathology and Microbiology, University of California, Riverside, CA 92521
2. Center for Plant Cell Biology, University of California, Riverside, CA 92521
3. Department of Botany and Plant Sciences, University of California, Riverside, CA 92521
4. College of Life Science and Technology, Xinjiang University, Urumqi, China, 830046
5. Department of Plant Pathology, Nanjing Agriculture University, Nanjing, China, 210095
6. Howard Hughes Medical Institute, University of California, Riverside, CA 92521

\* Corresponding author:

Wenbo Ma

Phone: 951-827-4349

Fax: 951-827-4294

Email: [wenbo.ma@ucr.edu](mailto:wenbo.ma@ucr.edu)

## Supplementary Figures

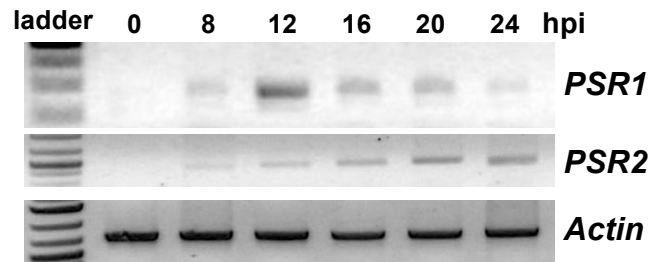

**Supplementary Figure 1.** Expression of *PSR1* and *PSR2* genes upon *Phytophthora sojae* infection of soybean roots. Transcript levels of *PSR1* and *PSR2* were determined by semi-quantitative RT-PCR during a time course (0-24 hours post infection) using total RNAs extracted from roots infected with *P. sojae* strain P6497. Soybean actin gene was used as an internal control.

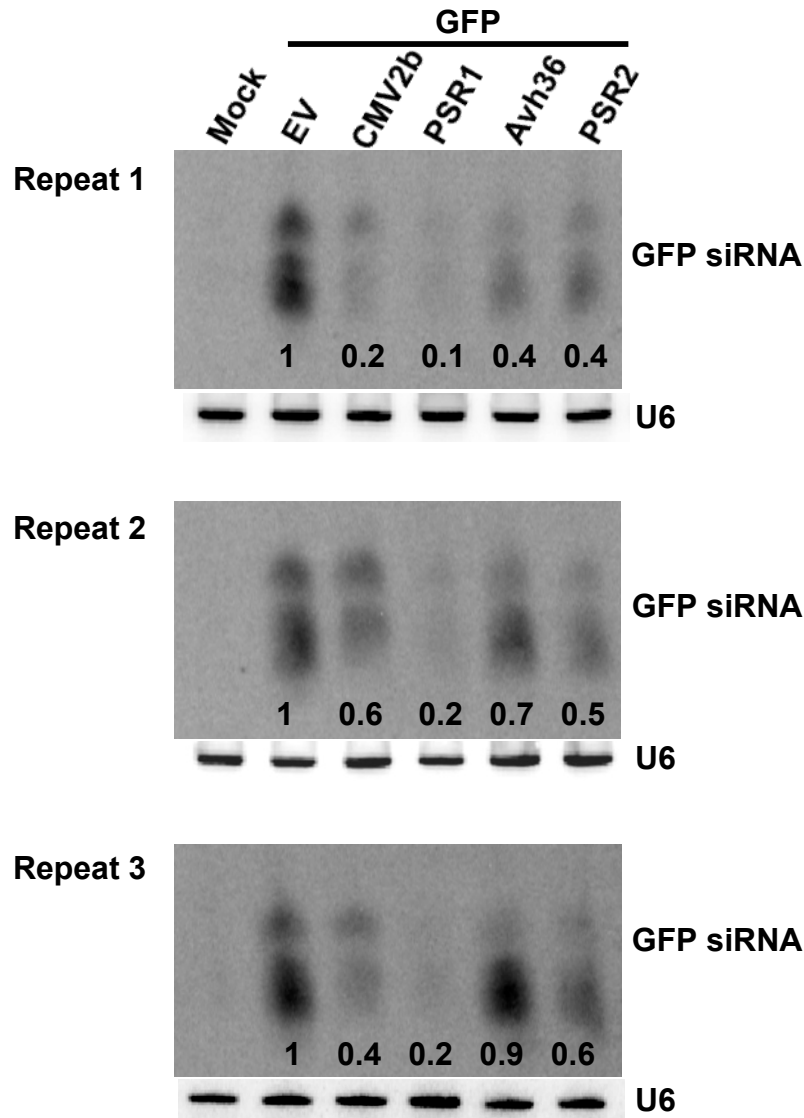

**Supplementary Figure 2.** *GFP* siRNA accumulation in the leaves of *N. benthamiana* 16c plants infiltrated with *Agrobacterium tumefaciens* carrying *35S-GFP* and individual viral or *Phytophthora* effectors. Leaves at a similar developmental stage and without *Agro*-infiltration were used as the mock control. The numbers represent relative siRNA abundance. Data from one representative experiment are shown in Fig. 1b and results from three additional independent biological replicates are shown here. Avh36 is a *P. sojae* effector that may also possess RNA silencing suppression activity but has not been focused in this paper because it did not show consistent suppression of RNA silencing as the other two PSRs did.

|   | Constructs | No. plants infiltrated | No. plants systemically silenced | No. plants systemically partially silenced |
|---|------------|------------------------|----------------------------------|--------------------------------------------|
| 1 | GFP+EV     | 30                     | 30                               | 0                                          |
| 2 | GFP+CMV2b  | 30                     | 0                                | 8                                          |
| 3 | GFP+PSR1   | 40                     | 0                                | 13                                         |
| 4 | GFP+PSR1M  | 30                     | 30                               | 0                                          |
| 5 | GFP+PSR2   | 36                     | 36                               | 0                                          |

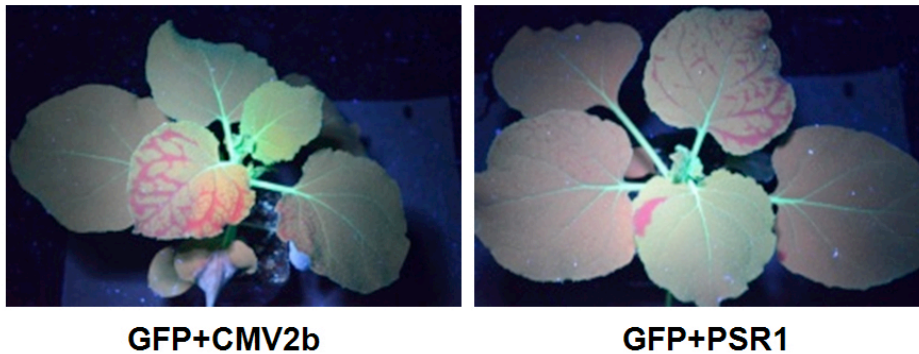

**Supplementary Figure 3.** Systemic silencing of GFP suppressed by PSR1 in *N. benthamiana* 16c plants. Leaves of *N. benthamiana* 16c plants were infiltrated with *Agrobacterium tumefaciens* carrying 35S-GFP and one of the following constructs: empty vector (EV), 35S-CMV2b (positive control), 35S-PSR1, 35S-PSR1M and 35S-PSR2. The table specified the numbers of completely and partially silenced plants on the systemic tissues. For leaves expressing PSR1 or CMV2b, both complete and partial suppression of GFP silencing (lower panel) were observed. Systemic silencing for these partially silenced plants was restricted to the regions on and around the veins of the leaves.

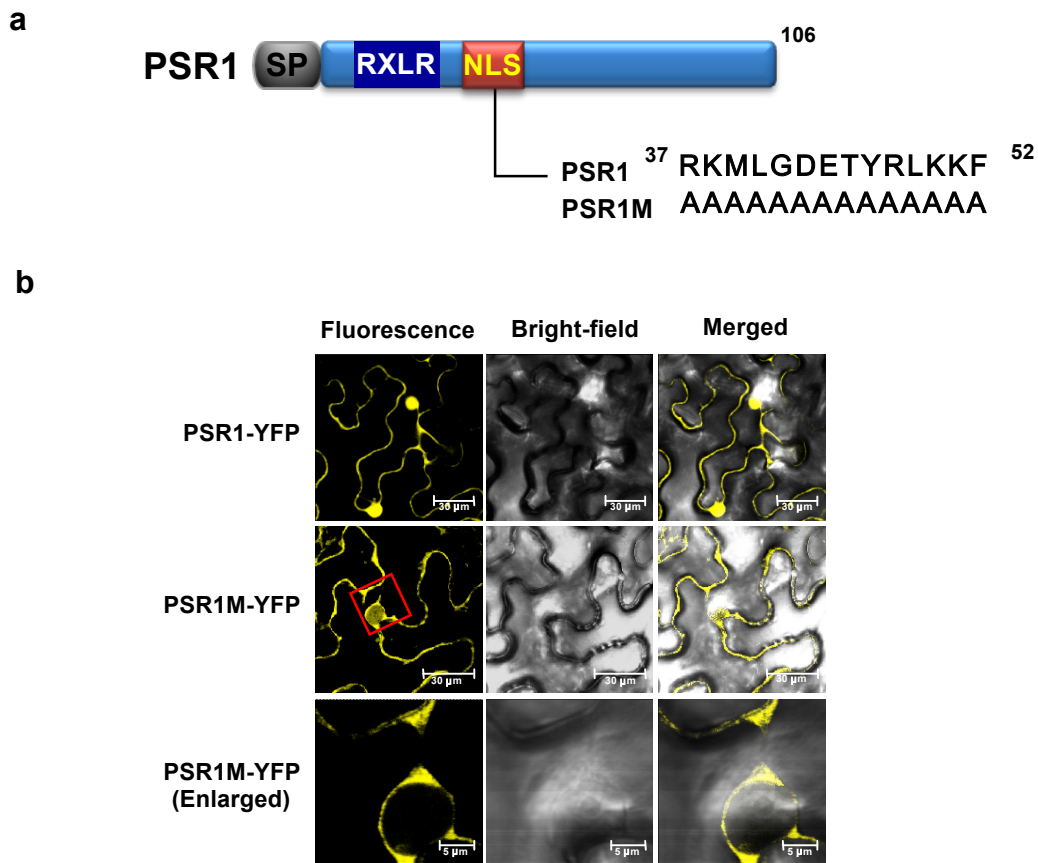

**Supplementary Figure 4.** PSR1 contains a potential nuclear localization signal (NLS) and is located in the nucleus in plant cells. **(a)** Schematic map showing motif architectures of PSR1. SP, signal peptide region; RXLR, RxLR/dEER host targeting motif; and NLS, bipartite nuclear localization signal. The mutant PSR1M was generated by replacing all 16 amino acid residues in the NLS motif to alanines. **(b)** Subcellular localizations of the PSR1-YFP and PSR1M-YFP fusion proteins were determined in *N. benthamiana* leaves after *Agrobacterium*-mediated transient expression. Yellow fluorescence was detected by confocal microscopy from infiltrated tissues 48 hours post *Agro*-infiltration. Nuclear region in the red box was enlarged to better visualize the lack of PSR1M proteins in the nucleoplasm.

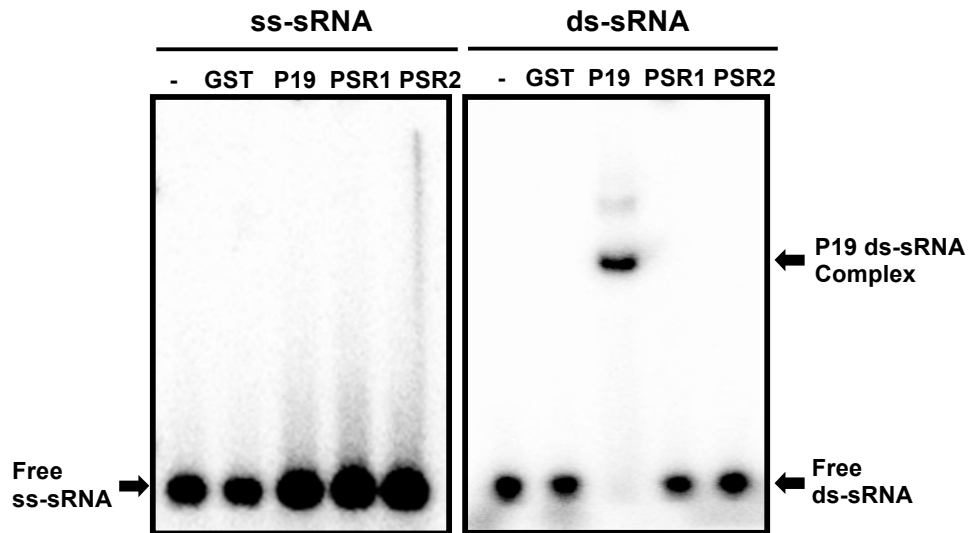

**Supplementary Figure 5.** PSR1 and PSR2 do not possess small RNA binding activity in vitro. Electrophoretic mobility shift assays were performed using purified GST-tagged recombinant proteins and  $^{32}\text{P}$ -labelled synthetic small RNA oligos that were 21 nt in length. The viral RNA silencing suppressor P19 that is known to bind to ds-sRNA was used as a positive control.

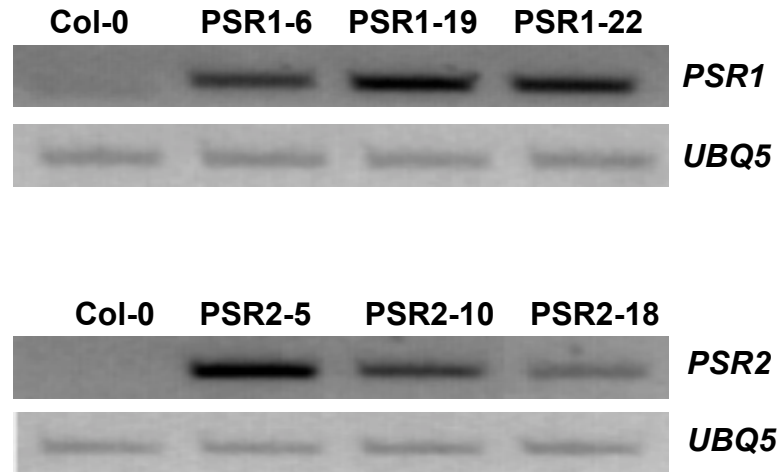

**Supplementary Figure 6.** Semi-quantitative RT-PCR showing the expression of *PSR1* and *PSR2* in transgenic *Arabidopsis* plants. Three independent transgenic lines (as indicated by the different numbers) harboring *35S-PSR1-YFP* or *35S-PSR2-Flag* were assayed for transgene expression. Col-0, wild-type. Inflorescence tissues were used to confirm the expression of *PSR1-YFP* and *PSR2-Flag* in the transgenic lines by RT-PCR with *UBQ5* as an internal control. The three lines with varying expression levels for each construct were further investigated for small RNA levels (Fig. S7, S9).

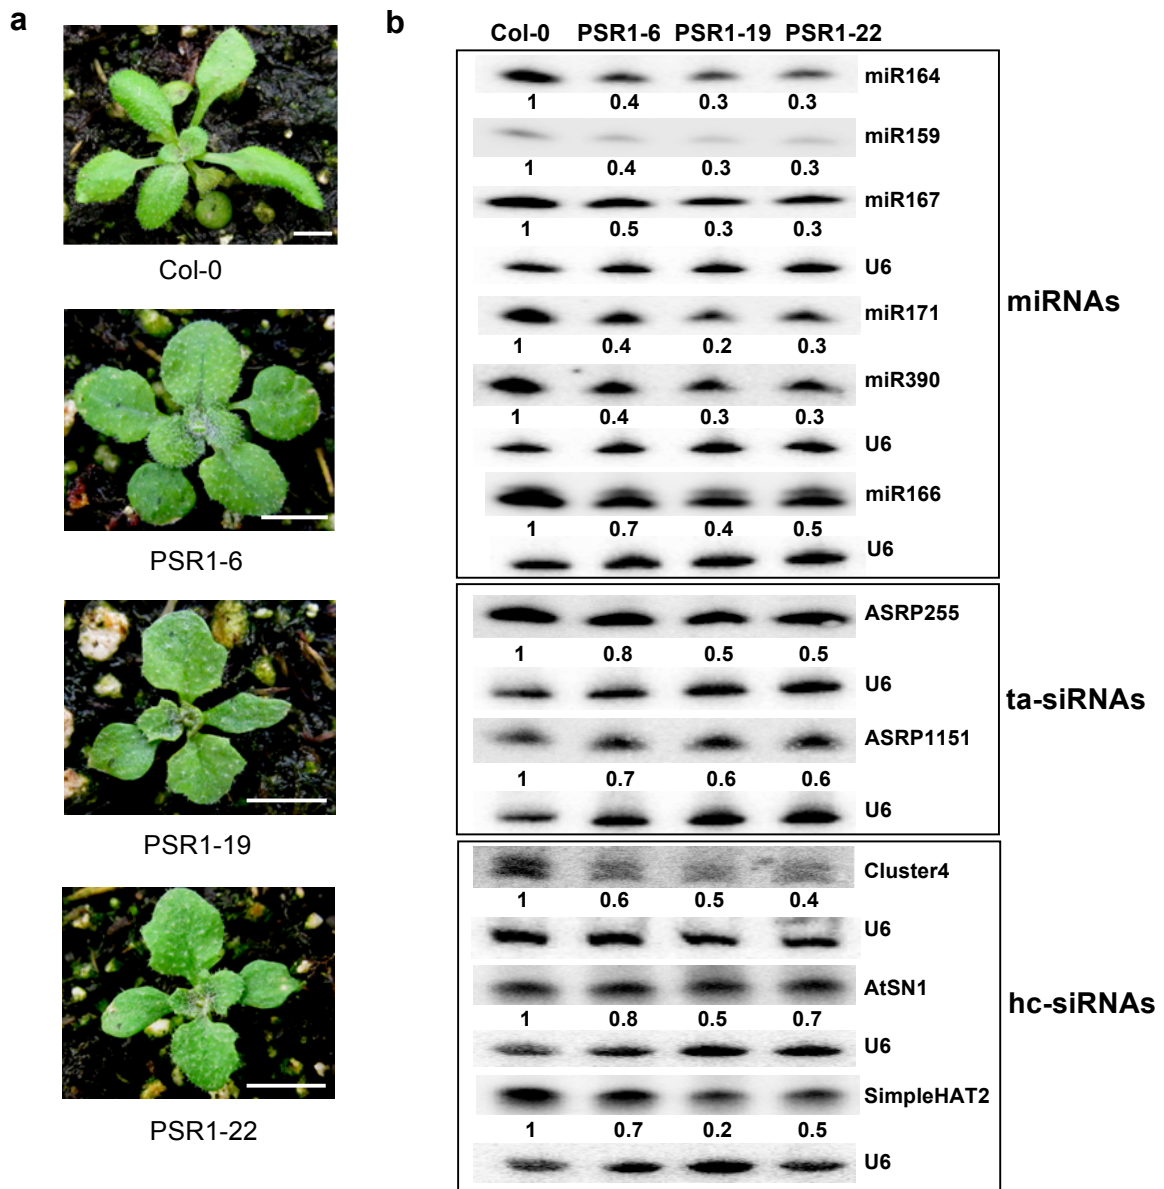

**Supplementary Figure 7.** Reduced accumulation of small RNAs in *Arabidopsis* transgenic lines expressing PSR1. **a**, *PSR1*-expressing plants are much smaller with other morphological phenotypes. Pictures were taken on 20-day-old *Arabidopsis* plants grown in soil. Col-0, wild-type; PSR1-6, PSR1-19, PSR1-22, three independent *35S-PSR1-YFP Arabidopsis* transgenic lines. **b**, Levels of representative miRNA, trans-acting siRNA (ta-siRNA) and heterochromatic siRNA (hc-siRNA) species in wild-type (Col-0) and the transgenic lines were determined by northern blots using total RNAs extracted from inflorescences. U6 served as an internal control for each blot. The numbers below the gel images represent relative small RNA abundance.



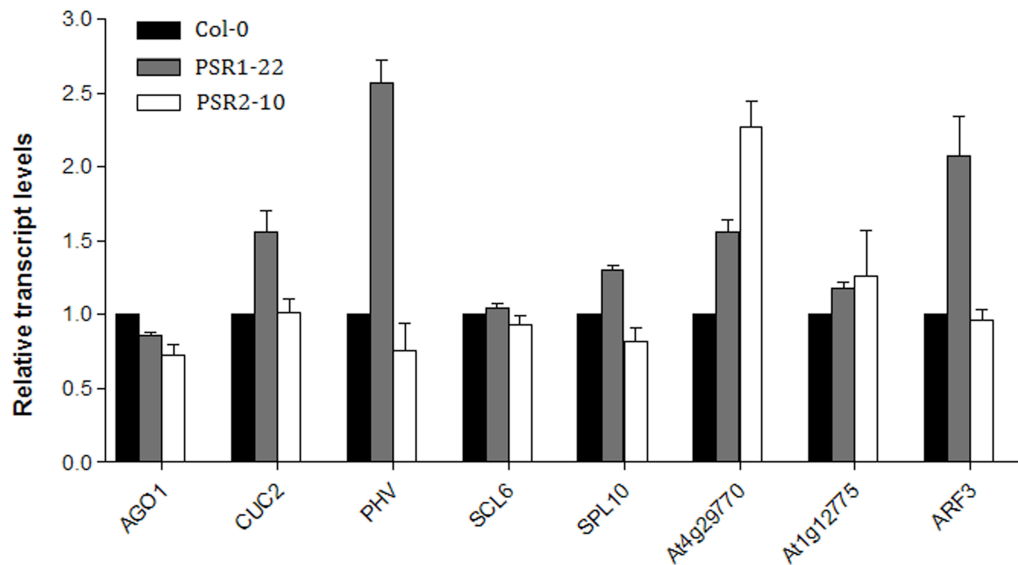

**Supplementary Figure 8.** Transcript levels of miRNA or ta-siRNA target genes were determined by quantitative RT-PCR in wild-type (Col-0) and representative transgenic *Arabidopsis* lines expressing PSR1 or PSR2. *AGO1*, *CUC2*, *PHV*, *SCL6*, and *SPL10* are targets of miR168, miR164, miR165/166, miR171, and miR156/157, respectively. *At4g29770*, *At1g12775*, and *ARF3* are targets of ta-siRNAs from *TAS1*, *TAS2*, and *TAS3*, respectively. Total RNAs extracted from inflorescences were used for this analysis.

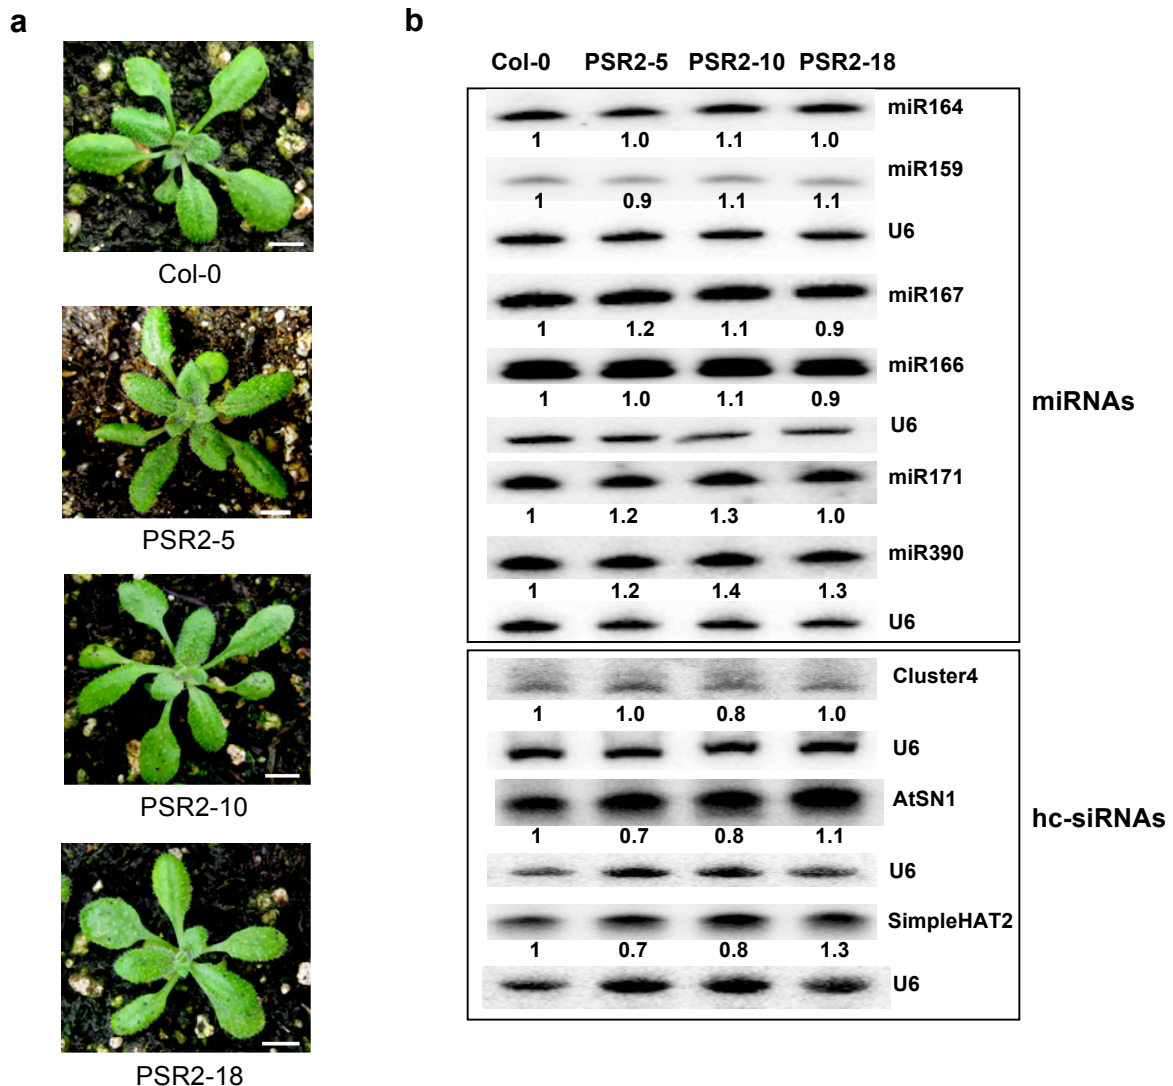

**Supplementary Figure 9.** PSR2 does not affect the accumulation of miRNAs or heterochromatic siRNAs (hc-siRNAs) in *Arabidopsis*. **(a)** Expression of PSR2 does not significantly change the morphological phenotype in *Arabidopsis*. Pictures were taken on 20-day-old *Arabidopsis* plants grown in soil. Col-0, wild-type; PSR2-5, PSR2-10, PSR2-18, three independent *35S-PSR2-Flag Arabidopsis* transgenic lines. **(b)** Levels of representative miRNAs and heterochromatic siRNAs (hc-siRNAs) in wild-type and *35S-PSR2-Flag* transgenic *Arabidopsis* lines were determined by northern blotting. The numbers below the images represent relative abundance of the small RNAs compared to wild-type (Col-0). U6 served as an internal loading control.

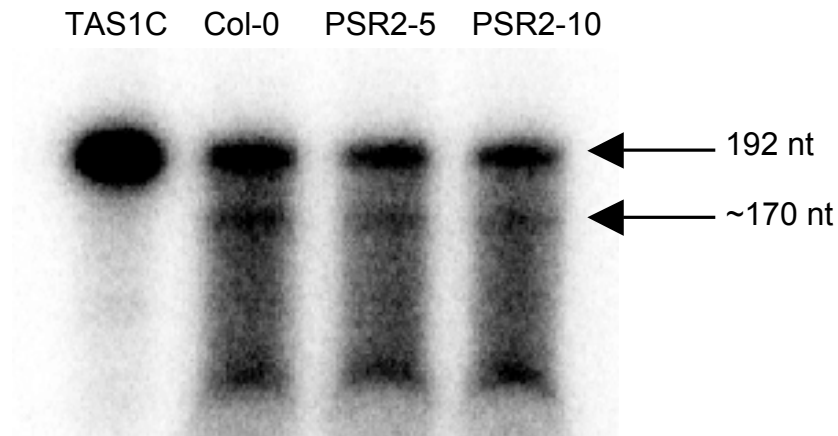

**Supplementary Figure 10.** AGO1-miR173 slicer activity assay in wild-type (Col-0) and two independent *PSR2*-expressing *Arabidopsis* lines. A portion of the *TAS1c* locus containing the miR173 target site was amplified by PCR with one of the primers containing a T7 promoter sequence. The PCR fragment was used as a template for in vitro transcription by T7 polymerase to generate a 192 nt *TAS1c* transcript, which was incubated with AGO1 immunoprecipitates from Col-0 or two *PSR2*-expressing lines. AGO1/miR173-mediated cleavage of the 192 nt transcript results in a 170 nt fragment and a 22 nt fragment, the latter beyond the range of detection. This assay showed that *PSR2* did not affect the slicer activity of AGO1/miR173 in *Arabidopsis*.

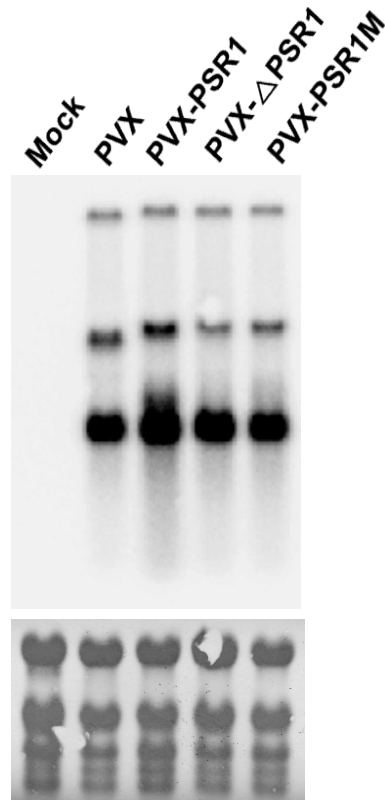

**Supplementary Figure 11.** PSR1 promotes the infection of *N. benthamiana* by potato virus X (PVX). *N. benthamiana* plants were infiltrated with *Agrobacterium tumefaciens* carrying *35S-PVX*, *35S-PVX-PSR1*, *PVX-PSR1M* or *35S-PVX-ΔPSR1*. The accumulation of PVX genomic and subgenomic RNAs was analyzed at four days post inoculation. This experiment was repeated twice with similar results. Data from one representative experiment are shown in Fig. 3b; additional data from the other replicate are shown here.

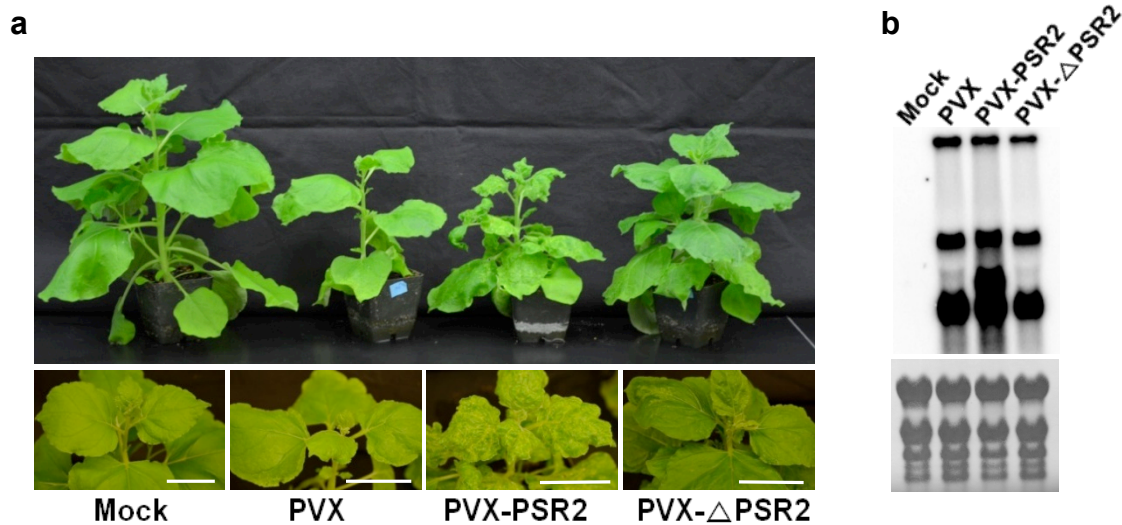

**Supplementary Figure 12.** PSR2 promotes PVX infection of *N. benthamiana*. **(a)** Disease symptoms of *N. benthamiana* plants infiltrated with *Agrobacterium tumefaciens* strains carrying *35S-PVX*, *35S-PVX-PSR2* or *35S-PVX- $\Delta$ PSR2*. The plants infected with PVX-PSR2 exhibited more severe mosaic symptoms compared to those expressing wild-type *35S-PVX* or *35S-PVX- $\Delta$ PSR2*. The photograph was taken at 21 days post-infiltration (dpi). **(b)** Northern blot analysis showing the accumulation of viral genomic (gRNA) and subgenomic mRNAs at 21 dpi. This experiment was repeated twice with similar results.

### Repeat 1

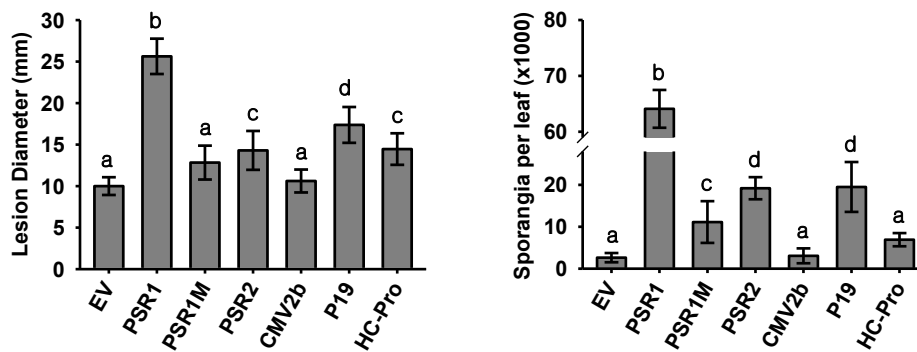

### Repeat 2

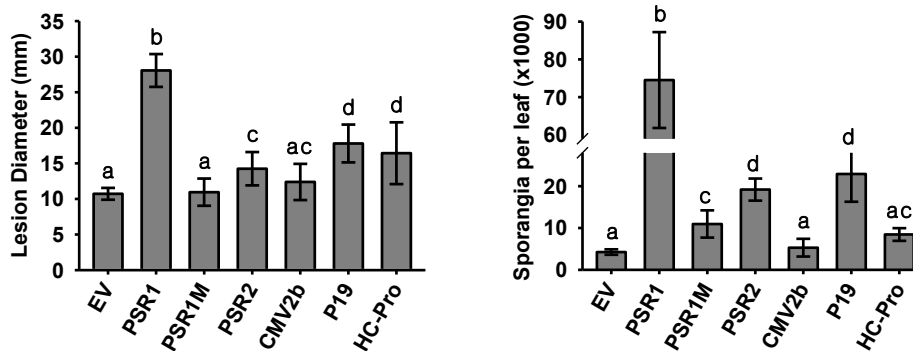

**Supplementary Figure 13.** Over-expression of *Phytophthora* and viral RNA silencing suppressors in *N. benthamiana* increases plant susceptibility to the infection of *Phytophthora infestans* isolate 1306. Data from two independent biological replicates are presented showing the lesion sizes and numbers of sporangia from *N. benthamiana* leaves expressing PSRs and VSRs. In each experiment, leaves from 6-10 plants were used for each treatment. Error bars represent standard errors and different letters indicate values with significant differences.

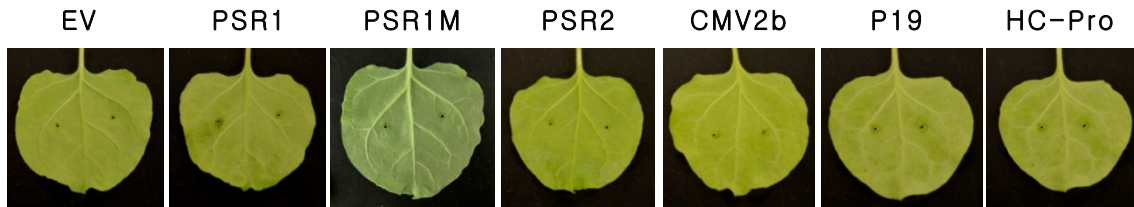

**Supplementary Figure 14.** Expression of the PSRs and VSRs in *N. benthamiana* leaves did not elicit visible lesions or cell death symptoms without the subsequent infection of *P. infestans*. The effector proteins were expressed in *N. benthamiana* by *Agro*-infiltration. 24 hours after the plants were *Agro*-infiltrated, the leaves were detached and incubated in a growth chamber at 18°C. The photograph was taken seven days after *Agro*-infiltration.

**Supplementary Table 1.** Bacterial strains and plasmids used in this study

| Strains or Plasmids                             | Description                                                                                                                                                  | Source/ reference     |
|-------------------------------------------------|--------------------------------------------------------------------------------------------------------------------------------------------------------------|-----------------------|
| <i>Escherichia coli</i> DH5 $\alpha$            | F- $\Phi$ 80dlacZ $\Delta$ M15 $\Delta$ (lacZYA-argF) U169 <i>recA1 endA1, hsdR17</i> (rk-, mk+) <i>phoA supE44 <math>\lambda</math>- thi-1 gyrA96 relA1</i> | Invitrogen            |
| <i>Escherichia coli</i> BL21(DE3)               | F- <i>ompT gal dcm lon hsdS<sub>B</sub>(<math>\Gamma</math>B- mB -) <math>\lambda</math></i> (DE3 [ <i>lacI lacUV5-T7 gene 1 ind1 sam7 nin5</i> ])           | Invitrogen            |
| <i>Agrobacterium tumefaciens</i> GV3101 (pMP90) | Rif <sup>R</sup> , Gent <sup>R</sup>                                                                                                                         | 26                    |
| <i>Agrobacterium tumefaciens</i> C58C1 (pCH32)  | Rif <sup>R</sup> , Tet <sup>R</sup>                                                                                                                          | 26                    |
| <i>Phytophthora infestans</i> isolate 1306      | A1 mating type                                                                                                                                               |                       |
| <i>Phytophthora sojae</i> strain P6497          | Race 2 strain with full genome sequenced                                                                                                                     | 3, 27, Michael Coffey |
| pCAMBIA1300:: <i>CMV2b</i>                      | pCAMBIA1300 carrying <i>CMV2b</i> , Kan <sup>R</sup>                                                                                                         | 30, Shou-Wei Ding     |
| pCAMBIA1300:: <i>P19</i>                        | pCAMBIA1300 carrying <i>P19</i> , Kan <sup>R</sup>                                                                                                           | Shou-Wei Ding         |
| pCAMBIA1300:: <i>HC-Pro</i>                     | pCAMBIA1300 carrying <i>HC-Pro</i> , Kan <sup>R</sup>                                                                                                        | Shou-Wei Ding         |
| pEG100                                          | pEarleyGate100, a Gateway binary vector with cauliflower mosaic virus 35S promoter, Kan <sup>R</sup>                                                         | 28                    |
| pEG100:: <i>PSR1</i>                            | pEG100 carrying <i>PSR1</i> , Kan <sup>R</sup>                                                                                                               | This study            |
| pEG100:: <i>PSR1-YFP</i>                        | pEG100 carrying <i>PSR1-YFP</i> , Kan <sup>R</sup>                                                                                                           | This study            |
| pEG100:: <i>PSR1M</i>                           | pEG100 carrying <i>PSR1M</i> (lacking the putative NLS motif), Kan <sup>R</sup>                                                                              | This study            |
| pEG100:: <i>PSR2</i>                            | pEG100 carrying <i>PSR2</i> , Kan <sup>R</sup>                                                                                                               | This study            |
| pEG100:: <i>PSR2-Flag</i>                       | pEG100 carrying <i>PSR2-Flag</i> , Kan <sup>R</sup>                                                                                                          | This study            |
| pEG101                                          | pEarleyGate101, a Gateway binary vector with cauliflower mosaic virus 35S promoter and <i>yfp</i> , Kan <sup>R</sup>                                         | 28                    |
| pEG101:: <i>PSR1</i>                            | pEG101 carrying <i>PSR1</i> tagged with YFP at the C-terminus, Kan <sup>R</sup>                                                                              | This study            |
| pEG101:: <i>PSR1M</i>                           | pEG101 carrying <i>PSR1M</i> tagged with YFP at the C-terminus, Kan <sup>R</sup>                                                                             | This study            |
| pGR106                                          | a binary vectors carrying the Potato virus X genome, Kan <sup>R</sup>                                                                                        | 37, Sophien Kamoun    |
| pGR106:: <i>PSR1</i>                            | pGR106 carrying <i>PSR1</i> , Kan <sup>R</sup>                                                                                                               | This study            |
| pGR106:: <i>PSR1M</i>                           | pGR106 carrying <i>PSR1M</i> (lacking the putative NLS motif), Kan <sup>R</sup>                                                                              | This study            |
| pGR106:: $\Delta$ <i>PSR1</i>                   | pGR106 carrying $\Delta$ <i>PSR1</i> (stop codon at the 3 aa position of the ORF), Kan <sup>R</sup>                                                          | This study            |
| pGR106:: <i>PSR2</i>                            | pGR106 carrying <i>PSR2</i> , Kan <sup>R</sup>                                                                                                               | This study            |
| pGR106:: $\Delta$ <i>PSR2</i>                   | pGR106 carrying $\Delta$ <i>PSR2</i> (stop codon at the 8 aa position of the ORF), Kan <sup>R</sup>                                                          | This study            |
| pGEX4T-2                                        | <i>E. coli</i> expression vector with C-terminal GST tag, Amp <sup>R</sup>                                                                                   | Amersham              |
| pGEX4T-2:: <i>PSR1</i>                          | pGEX4T-2 carrying <i>PSR1</i> that expresses GST-PSR1, Amp <sup>R</sup>                                                                                      | This study            |
| pGEX4T-2:: <i>PSR2</i>                          | pGEX4T-2 carrying <i>PSR2</i> that expresses GST-PSR2, Amp <sup>R</sup>                                                                                      | This study            |
| pGEX4T-2:: <i>P19</i>                           | pGEX4T-2 carrying <i>P19</i> that expresses GST-P19, Amp <sup>R</sup>                                                                                        | This study            |
| pTH209                                          | <i>Phytophthora</i> transformation vector used as a helper vector for dsRNA-induced silencing of <i>PSR2</i> , G418 <sup>R</sup> , Kan <sup>R</sup>          | 40                    |



Supplementary Table S2. *Phytophthora sojae* PsAvh genes screened for RNA silencing suppression activity in this study

| Index | Effector ID       | VMD ID  | Primers used in this study for gene cloning |                                      |
|-------|-------------------|---------|---------------------------------------------|--------------------------------------|
|       |                   |         | Forward sequence                            | Reverse sequence                     |
| 1*    | Avr1b             | AAM2093 |                                             |                                      |
| 2*    | PsAvh_5           | 158993  |                                             |                                      |
| 3*    | PsAvh_6           | 158994  |                                             |                                      |
| 4     | PsAvh_8           | 158999  | CTACGTCGACATGTTGTGTCAGCGGGCCCGGCAAGG        | TCTACGAATTCGACTATGGGTACTGTCTAGTGTTC  |
| 5     | PsAvh_16          | 159004  | TCTACGTCGACATGGCCCTCCCTTCGGCCACGGCAT        | TCTACGAATTCGATCACATGCCATCTTCTTTGCTT  |
| 6     | PsAvh_18          | 159006  | CTACGAATTCGCATGACTAAACCGTCGACGGAGGC         | CTACGATATCTTCATTGTTCTAGCCACGCCCT     |
| 7     | PsAvh_23          | 159011  | TCTACGTCGACATGCTCGCCACCGCCGAGGCCCA          | TCTACGAATTCGATCATGCAATGTCGGAAAGTTGA  |
| 8     | PsAvh_29          | 159017  | TCTACGAATTCGCATGGCCGTGCGGGTGCAGCGA          | TCTACGATATCTTCAATGGAATATTTGATGAGCCA  |
| 9     | PsAvh_35          | 159022  | CTACGAATTCGCATGGCCCGGGTGGTACTGCCGT          | CTACGATATCTCTAATGGTTGGTGAACCAGTA     |
| 10    | PsAvh_36          | 159023  | CTACGAATTCGCATGCTCTCGACCACACGGACTC          | CTACGATATCTTCAAGTGAGACTCCTTCTTCG     |
| 11    | PsAvh_38          | 159025  | TCTACGAATTCGCATGGTTTCAGGTCCTCCAGCTGC        | TCTACCTCGAGTGTATGTCCGTGTCGGATGTCCCT  |
| 12    | PsAvh_39          | 159026  | CTACGTCGACATGGCTCAACCCACGCCAGTGAA           | CTACGAATTCGATTAGTCGATCTTACCTTTCC     |
| 13    | PsAvh_42          | 159029  | CTACGTCGACATGTTGAGTATCACCATTCCGA            | CTACGAATTCGATCACTTTTTTGGGATCGACG     |
| 14    | PsAvh_52          | 159037  | TCTACGTCGACATGCTCAGTTGACCAAGGATTCCA         | TCTACGAATTCGATCAGTTGGCCGCTTATAAACCT  |
| 15    | PsAvh_63          | 159042  | CTACGTCGACATGCAATCTCCGCCACCGCCAC            | CTACGAATTCGATTACGTAGTCTCTGGTGCA      |
| 16    | PsAvh_66          | 159045  | CTACGTCGACATGGTTCCTGCTCCGCGACAT             | CTACGAATTCGATTAGGGGTATCTCAGGGGCC     |
| 17    | PsAvh_67          | 159046  | CTACGAATTCGCATGCTCCCGCGACACCAGCGGC          | CTACGATATCTTTACAAATCTGCCAGTCTG       |
| 18*   | PsAvh_73          | 159050  |                                             |                                      |
| 19*   | PsAvh_92 (Avr3a)  | 159064  |                                             |                                      |
| 20    | PsAvh_94          | 159065  | TCTACGTCGACATGGCCAACCAAGTGGAGTCGT           | TCTACGAATTCGACTAAGCGGTGCTCTCTCTCTCT  |
| 21    | PsAvh_105         | 159073  | CTACGTCGACATGGCTCAGATCTGACCACGACG           | CTACGAATTCGATTAAATCTTAAACTTGCCGAC    |
| 22    | PsAvh_109         | 159076  | TCTACGAATTCGCATGCTTCAGGTCCTCCCAATTC         | TCTACGATATCTTTAATCAGCGGTTTGTGCGCTGTA |
| 23    | PsAvh_115         | 159081  | TCTACGTCGACATGGTCCAGACTCGAAGGTCTCAA         | TCTACGAATTCGACTAGGCGGCATCTTTCGCGCAT  |
| 24    | PsAvh_122         | 159085  | CTACGTCGACATGTTGGTCTTGGGGAAGGTGT            | CTACGAATTCGATTAGACTGCTCCATGACGC      |
| 25    | PsAvh_127         | 159090  | CTACGTCGACATGGCGGGCTCGCTGATGCATC            | CTACGAATTCGATTACTTTTTGGCCAGAGTTGG    |
| 26    | PsAvh_137         | 159094  | TCTACGTCGACATGGCCGTGGCCGATCCAAAGAGCT        | TCTACGAATTCGATCAGGGTAAATGTATCCCTCAA  |
| 27    | PsAvh_138         | 159095  | CTACGAATTCGCATGCTTCAACCGGACAGATCGC          | CTACGATATCTTTACTGCTTACTACACCAATA     |
| 28    | PsAvh_139         | 159096  | CTACGTCGACATGGGCTGCTGTCACAGAATC             | CTACGAATTCGATTAGGGATTGAAAGAAAATA     |
| 29    | PsAvh_140         | 159097  | TCTACGGATCCGGATGGAATTCCTTCGGTGGCTTC         | TCTACGATATCTCTACTGTTTGTGCTGGTCAGCTC  |
| 30    | PsAvh_145         | 159101  | CTACGAATTCGCATGACACCAGCATCTCTACTAAC         | CTACGATATCTCTACTTCTTGAGACGTTTGAAGGC  |
| 31    | PsAvh_146         | 159102  | CTACGAATTCGCATGACACATGCTCTCTTAACGT          | CTACGATATCTTTACCCCACTGACTTTGAACCT    |
| 32    | PsAvh_147         | 159103  | CTACGTCGACATGTCGGTGACAGATAACTCAATCG         | CTACGAATTCGATTAGTTCGCCCTGTTCTGCGCA   |
| 33    | PsAvh_148         | 159104  | CTACGTCGACATGGAATCTGTAGGCCCATCAC            | CTACGAATTCGATCACCGCCAGAAAGGATATTCA   |
| 34    | PsAvh_151         | 159107  | CTACGAATTCGCATGGCACCCGAGTCTGCCACCGC         | CTACGATATCTTCTACTGAATCTTCTGACCTTTGAG |
| 35    | PsAvh_156         | 159112  | CTACGTCGACATGGCTCAGGCGACTTCGACGCT           | CTACGAATTCGACTACAGCAGATACAGCTTGTATG  |
| 36    | PsAvh_162         | 159118  | CTACGTCGACATGAGCACCGACTCCAAGATCGT           | CTACGAATTCGATTATTTTGCCTTACGTTTATGG   |
| 37    | PsAvh_163         | 159119  | CTACGTCGACATGGCTACCGTATCAGCACTCCAGC         | CTACGAATTCGACTAAGAGCGCCGAGGGTCCAT    |
| 38    | PsAvh_170         | 159126  | CTACGTCGACATGAGGACTGTGGTGACGCTTAGTT         | CTACGAATTCGACTAGGCACTGTATGCAGCTCGGA  |
| 39*   | PsAvh_171 (Avr4)  | 159127  |                                             |                                      |
| 40    | PsAvh_172         | 159128  | TCTACGAATTCGCATGGAGGTGCGACTCGAAGACGGC       | TCTACGATATCTCTATTCCCCCGTAATTTGTAAAA  |
| 41    | PsAvh_180         | 159136  | TCTACGTCGACATGGAGACCCAGCTTTTCGACAGCA        | TCTACGAATTCGACTAAGCGATGTTCTGCTGCTTCT |
| 42*   | PsAvh_181         | 159137  |                                             |                                      |
| 43    | PsAvh_182         | 159138  | CTACGTCGACATGCTACCGGCTCCGACCAACT            | CTACGAATTCGACTAGTGGGGAAATGTTGCGAGT   |
| 44    | PsAvh_183         | 159139  | CTACGTCGACATGGAGTCTGCTCCACAGATACTA          | CTACGAATTCGATTACGGGTAGCTTCTATGGATCG  |
| 45    | PsAvh_189         | 159145  | CTACGTCGACATGACCGCAGCCGTCACCGACTCGA         | CTACGAATTCGATCAGTAGTCGCAACCCGAACCTTA |
| 46    | PsAvh_190         | 159146  | CTACGAATTCGCATGACTACCGTCTCGACAAAGTC         | CTACGATATCTCTACGGGCAAGATGTGGATGGG    |
| 47    | PsAvh_194         | 159150  | CTACGTCGACATGCTTTACAGCGCCACGGAGATCGA        | CTACGAATTCGATTATCTCTGTTGGGACACCCTG   |
| 48    | PsAvh_196         | 159152  | TCTACGAATTCGCATGCTCGGTTAGCAACCTCCAAAC       | TCTACCTCGAGTGTAGCTGAGCTTGGACGTCACC   |
| 49    | PsAvh_205         | 159161  | CTACGTCGACATGGAGCTGCTCTCGGCTCCATCG          | CTACGAATTCGATTAAACGACGAGCTTGTAGCCC   |
| 50    | PsAvh_231         | 159187  | TCTACGAATTCGCATGGCCGTGCATACCCAAGAAGG        | TCTACCTCGAGTGTAGGAAATCGATGTGCTTGTGG  |
| 51*   | PsAvh_238         | 159194  |                                             |                                      |
| 52    | PsAvh_240         | 159196  | TCTACGTCGACATGGACGCGCCGAGTTCTCGAGA          | TCTACGAATTCGACTAGTTTGGCGGTTGGTTCGGGA |
| 53    | PsAvh_244         | 159200  | CTACGTCGACATGGCCAGGAACCGTGCACCCGGGA         | CTACGAATTCGATCAGCGACTTTTCGCCACAGTCT  |
| 54    | PsAvh_254         | 159210  | CTACGAATTCGCATGGAGAAGGCCGTCGACGTGGA         | CTACGATATCTTCAAGTTGGCTGTTGGGCTGCCAT  |
| 55    | PsAvh_256         | 159212  | TCTACGTCGACATGGAGTCCGCAACCGGCTTTCCC         | TCTACGAATTCGATTAAAGTGGTCTTTTAGCAGCGG |
| 56    | PsAvh_260         | 159216  | TCTACGTCGACATGGCCAGTGCATCAGTGCTCGA          | TCTACGAATTCGATTAGTCTTTCGACATGGCGGTA  |
| 57    | PsAvh_263         | 159219  | TCTACGTCGACATGGATGACACCGACCGAAGCCT          | TCTACGAATTCGACTAATGGATATAACTGTTCTTGA |
| 58*   | PsAvh_275 (Avr1a) | 159231  |                                             |                                      |
| 59*   | PsAvh_331 (Avr1k) | 159287  |                                             |                                      |

\* effector constructs provided by Dr. Brett Tyler

**Supplementary Table 3. Primers used in this study.**

|                                     | <b>Primer name</b>     | <b>Primer sequence (5' to 3')</b>          |
|-------------------------------------|------------------------|--------------------------------------------|
| <b>PVX assay</b>                    | pGR-PSR1ClaI-F         | CTACATCGATATGACTAAACCGTCGACGGAGGC          |
|                                     | pGR-ΔPSR1ClaI-F        | CTACATCGATATGACTAAACCGTAGACGGAGGC          |
|                                     | pGR-PSR1NotI-R         | CTACGCGGCCGCTTTTGTCTAGCCACGCCTTGT          |
|                                     | pGR-PSR2AscI-F         | CTACGGCGCGCCATGACACATGCTCCTCCTAACGTTAAG    |
|                                     | pGR-ΔPSR2AscI-F        | CTACGGCGCGCCATGACACATGCTCCTCCTAACGTTTAG    |
|                                     | pGR-PSR2NotI-R         | CTACGCGGCCGACCCCCACCTGACTTTGAACTT          |
| <b>Northern blotting</b>            | PVXCP-F                | GTCAACTACCTCAACTACCAC                      |
|                                     | PVXCP-R                | TATGTAGACGTAGTTATGGTGG                     |
|                                     | GFP-F                  | GAAGGTGATGCAACATACGG                       |
|                                     | GFP-R                  | TCCATGCCATGTGTAATCCC                       |
| <b>RT-PCR</b>                       | PSR1-RT-F              | ACTAAACCGTCGACGGAGGCGACTG                  |
|                                     | PSR1-RT-R              | TCATTGTTCTAGCCACGCCTTGTAC                  |
|                                     | PSR2-RT-F              | ACGAGGTTCTGTCCGGGTATG                      |
|                                     | PSR2-RT-R              | GTCAAGCGATAGCAACGTGA                       |
|                                     | AtUBQ5-F               | GGTGCTAAGAAGAGGAAGAAT                      |
|                                     | AtUBQ5-R               | CTCCTTCTTTCTGGTAAACGT                      |
|                                     | GmActin-F              | GTTCTCTCCTTGTATGCAAGTG                     |
|                                     | GmActin-R              | CCAGACTCATCATATTCACCTTTAG                  |
| <b>Q-RT-PCR</b>                     | PSR2-QPCR-F            | TGTTTCGCGGCAAAGAAGGAC                      |
|                                     | PSR2-QPCR-R            | CCTGACTTTGAACTTGGCGG                       |
|                                     | PsojaeActin-F          | ACTGCACCTTCCAGACCATC                       |
|                                     | PsojaeActin-R          | CCACCACCTTGATCTTCATG                       |
| <b>sRNA target real-time RT-PCR</b> | AGO1-F                 | TGGACCACCGCAGAGACAAT                       |
|                                     | AGO1-R                 | CATCATAACGCTGGAAAGACGACT                   |
|                                     | CUC2-F                 | TTTTTCCTCGTTTCGTTTCTA                      |
|                                     | CUC2-R                 | TCCAAATACAGTCAAGTCCA                       |
|                                     | PHV-F                  | CAAGGCTACAGGAACTGC                         |
|                                     | PHV-R                  | TGAGGATTTTCAGCGACCT                        |
|                                     | SCL6-F                 | ACTCAAGACAACCTCAAGCA                       |
|                                     | SCL6-R                 | GATAGATGCTTCACGAAAACG                      |
|                                     | SPL10-F                | TGAGACAAAGCCTACACAGATGGA                   |
|                                     | SPL10-R                | GATGATGCAACCCGACTTTTTTATG                  |
|                                     | At4G27990-F            | CCGTCAGGTAATGAAACAC                        |
|                                     | At4G27990-R            | TGGGATACAGAAGTCAACAA                       |
|                                     | At1G12775-F            | GCTTTTTTCTACTATGGGGGAAG                    |
|                                     | At1G12775-R            | ATGAGAGTGGGTTTATGTCC                       |
| ARF3-F                              | GGTGGCCTGGTTCAAAATGGAG |                                            |
| ARF3-R                              | CGGAAGAGGGTGATGATGATAC |                                            |
| <b>pre-miRN A northern blotting</b> | pre-miR164bF           | GATGGAGAAGCAGGGCACGT                       |
|                                     | pre-miR164bR           | GTGAAGATGGGCACATGAAG                       |
|                                     | pre-miR166aF           | AGATATATATTCAGAAACCCCTAG                   |
|                                     | pre-miR166aR           | GGTTCATTCACTGGATCTGAAAC                    |
| <b>PSR2 silencing</b>               | PSR2-F                 | GTAATACGACTCACTATAGGGACGAAGAGCGGGGAATCAACT |
|                                     | PSR2-R                 | GTAATACGACTCACTATAGGGGTCCCTGTCTTGTCAAGTCGT |

|                                | <b>Primer name</b> | <b>Primer sequence (5' to 3')</b>          |
|--------------------------------|--------------------|--------------------------------------------|
| <b>miRNA Northern blotting</b> | miR159             | TAGAGCTCCCTTCAATCCAAA                      |
|                                | miR167             | TAGATCATGTTGGCAGTTTCA                      |
|                                | miR319             | GGGAGCTCCCTTCAGTCCAA                       |
|                                | miR163             | ATCGAAGTTCCAAGTCTTCTCAA                    |
|                                | miR164             | TGCACGTGCCCTGCTTCTCCA                      |
|                                | miR171             | CGTGATATTGGCACGGCTCAA                      |
|                                | miR172             | ATGCAGCATCATCAAGATTCT                      |
|                                | ASRP255            | TACGCTATGTTGGACTTAGAA                      |
|                                | ASRP1151           | AAGTATCATCATTTCGCTTGGA                     |
|                                | ASR5D8             | AAAGGCCTTACAAGGTCAAGA                      |
|                                | miR173             | GTGATTTCTCTCTGTAAGCGA                      |
|                                | miR393             | GATCAATGCGATCCCTTTGGA                      |
|                                | miR166             | GGGGAATGAACGCTGTTTCGCT                     |
|                                | miR390             | GGCGCTATCCCTCCTGAGCTT                      |
|                                | miR168             | TTCCCGACCTGCACCAAGCGA                      |
|                                | siR1003            | ATGCCAAGTTTGGCCTCACCGTC                    |
|                                | AtSN1              | ACCAACGTGTTGTTGGCCAGTGGTAAATCTCTCAGAT      |
|                                | SimpleHAT2         | TGGGTTACCCATTTTGACACCCCTA                  |
|                                | Cluster4           | AAGATCAAACATCAGCAGCGTCAGAGGCTT             |
|                                | U6                 | AGGGGCCATGCTAATCTTCTC                      |
| <b>pri-miRNA Q-RT-PCR</b>      | pri-miR159F        | GGAGCTCTACTTCCATCGTCA                      |
|                                | pri-miR159R        | CCACGTTCTCATCAAAACTTT                      |
|                                | pri-miR163F        | GCATAGGTCTTGATTGGTGGGA                     |
|                                | pri-miR163R        | CGTTGTCGTTGAAGAGGTTG                       |
|                                | pri-miR164F        | CCATTGACGATTGCATCCTCG                      |
|                                | pri-miR164R        | TTGATGGAGAAGCAGGGCAC                       |
|                                | pri-miR166aF       | CACCACTCACTTATCTTCTTC                      |
|                                | pri-miR166aR       | CAGTCGAAATTATAGAATCTAGGGT                  |
|                                | pri-miR167F        | GAAGCTGCCAGCATGATCTA                       |
|                                | pri-miR167R        | GGGTTTATAGAAGGGTGCGA                       |
|                                | pri-miR171F        | CCGCGCCAATATCTCAGTA                        |
|                                | pri-miR171R        | TGTCTCCATTTCAACACACACA                     |
|                                | pri-miR172F        | TAGGGTTAGCATGTTGATGAC                      |
|                                | pri-miR172R        | CCTCAAGTTATCATATCGGAG                      |
|                                | pri-miR173F        | CTTCTTCTCACAAATAAACCCA                     |
|                                | pri-miR173R        | AAGATCTCTAACATTAATCAT                      |
|                                | pri-miR319F        | AGAGGTTAGCATGTTGATGAC                      |
|                                | pri-miR319R        | CCTCAAGTTATCATATCGGAG                      |
| <b>AGO1 slicer assay</b>       | TAS1CF             | TAATACGACTCACTATAGGGTTAGTTTGAGATTGCGTTTGTC |
|                                | TAS1CR             | CTAAGATCCACCGATAAATGGTC                    |
| <b>EMSA</b>                    | si21-1             | CGUACGCGAAUACUUCGAUU                       |
|                                | si21-2             | UCGAAGUAUUCGCGUACGUU                       |
|                                | P19-BamHI-F        | CTACGGATCCATGGAACGAGCTATAACAAGG            |
|                                | P19-XhoI-R         | CTACCTCGAGTTTACTCGCTTTCTTTCTTGA            |
|                                | PSR1-BamHI-F       | CTACGGATCCATGACTAAACCGTCGACGGAGGC          |
|                                | PSR1-EcoRI-R       | CTACGAATTCGTCATTGTTCTAGCCACGCCT            |
|                                | PSR2-BamHI-F       | CTACGGATCCATGACACATGCTCCTCCTAACGTTAAG      |
|                                | PSR2-EcoRI-R       | CTACGAATTCGTTACCCCCACCTGACTTTGA            |
